# Supplementary material
Source: publisher figshare collection journal article supplement (https://frontiersin.figshare.com/ndownloader/files/14529017)
Supplement: Supplementary file [file 14529017]

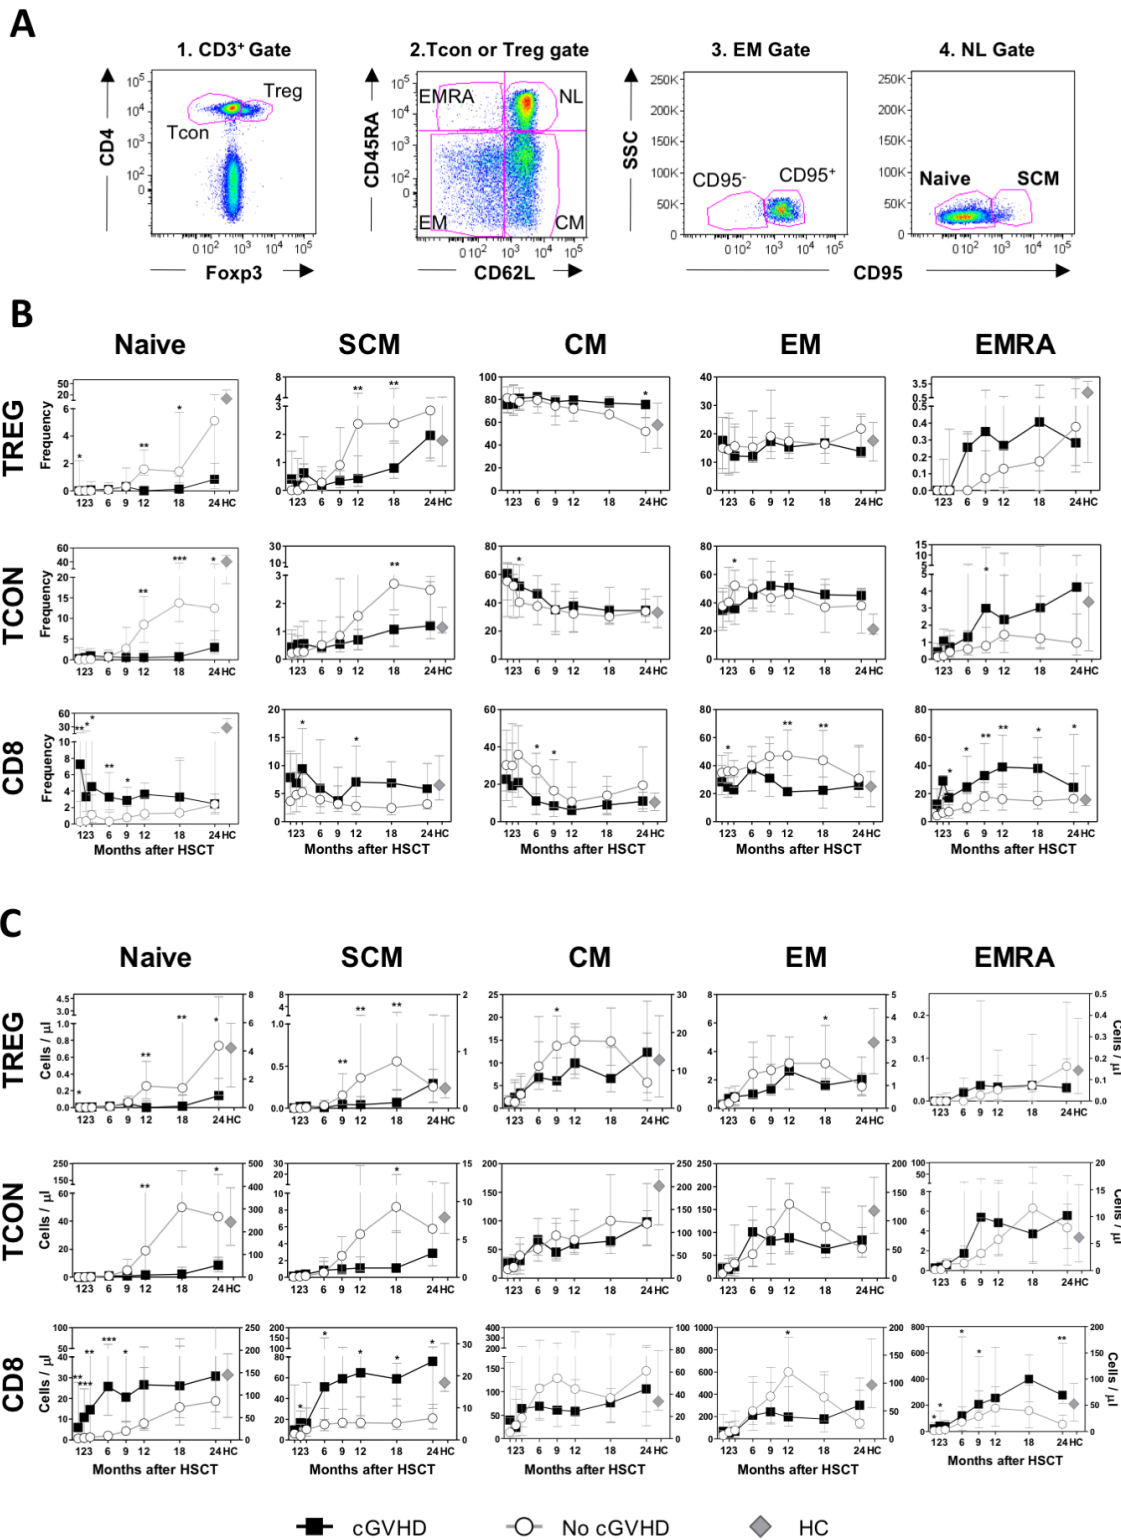

**Supplemental Figure 1. Treg, Tcon and CD8 subset reconstitution in cGVHD and No cGVHD patients**  
**(A)** Flow cytometry plots illustrating the gating strategy used to identify Naive and Memory subsets. Treg were identified as CD4<sup>+</sup> Foxp3<sup>+</sup>, Tcon as CD4<sup>+</sup> Foxp3<sup>-</sup> and CD8 as CD4<sup>-</sup>, all within CD3<sup>+</sup> lymphocytes. T cell populations were further divided into subsets according to CD45RA and CD62L expression: Central memory (CM, CD45RA<sup>-</sup> CD62L<sup>+</sup>), Effector Memory (EM, CD45RA<sup>-</sup> CD62L<sup>-</sup>), CD45RA<sup>+</sup> Effector Memory (EMRA, CD45RA<sup>+</sup> CD62L<sup>-</sup>), Naive-like (NL, CD45RA<sup>+</sup> CD62L<sup>+</sup>) cells. Stem Cell Memory (SCM) as CD45RA<sup>+</sup> CD62L<sup>+</sup> CD95<sup>+</sup> and Naive as CD45RA<sup>+</sup> CD62L<sup>+</sup> CD95<sup>-</sup> **(B)** Median percentages for each subset within Treg, Tcon and CD8 cells. **(C)** Median absolute cell number per  $\mu$ l for Treg, Tcon and CD8 subsets. No cGVHD: grey lines and circles; with cGVHD: black lines and squares; HC: grey diamonds and dotted lines. Median counts from patients are shown on the left and HC on the right y axis. Symbols represent median values  $\pm$  IQR. (\*p=0.01 to 0.05; \*\*p=0.001 to 0.01).
